# Supplementary material
Source: PubMed Central journal article supplement (PMC3993935)
Supplement: pr400801v_si_002.pdf [file pr400801v_si_002.pdf]

## Supporting Information

### **The newborn mouse lens proteome and its alteration by lysine 6 mutant ubiquitin**

Fu Shang<sup>1,4</sup>, Phillip A. Wilmarth<sup>2</sup>, Min-lee Chang<sup>1</sup>, Ke Liu<sup>1</sup>, Larry L. David<sup>2</sup>, Maria Andrea Caceres<sup>1</sup>, Eric Wawrousek<sup>3</sup>, Allen Taylor<sup>1,4</sup>

<sup>1</sup> Jean Mayer USDA Human Nutrition Research Center on Aging, Tufts University, Boston MA 02111;

<sup>2</sup> Department of Biochemistry & Molecular Biology, Oregon Health Sciences University, Portland, OR 97239;

<sup>3</sup> Genetic Engineering Core, National Eye Institute, National Institutes of Health, DHHS, Bethesda, MD 20892

<sup>4</sup> To whom communication should be addressed.

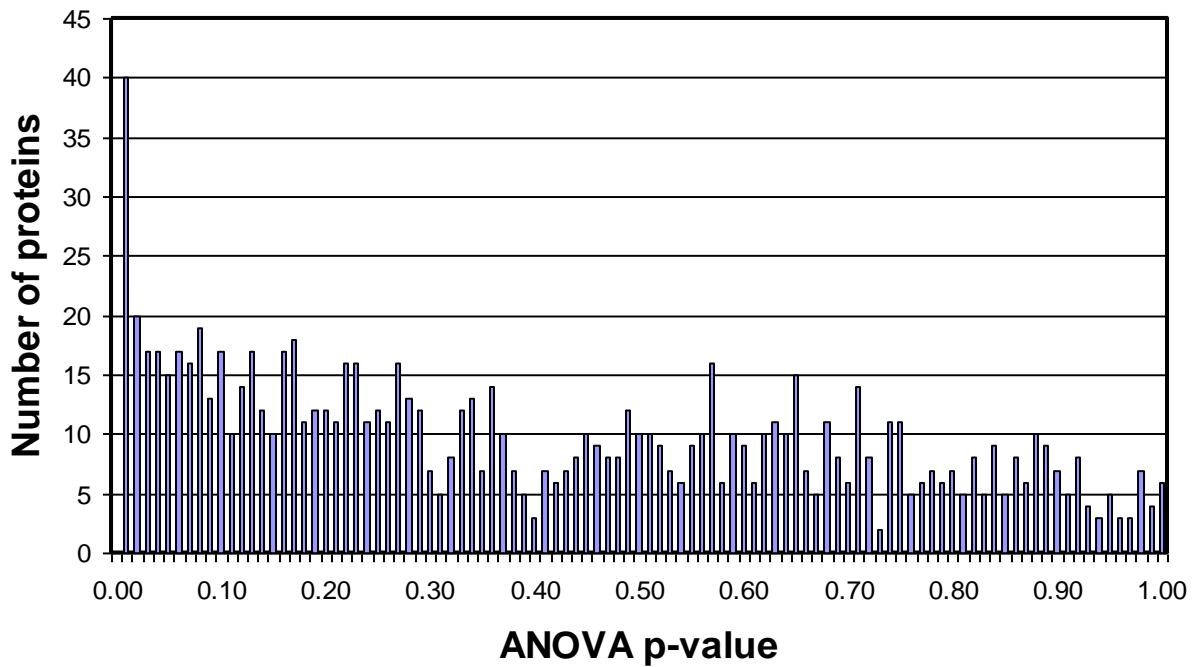

**Supplemental Fig. 1. Density histogram of ANOVA test p-value of the quantified 996 proteins.** The p-value distribution is composed of a uniform (flat) density from 0 to 1 for the non-differentially expressed proteins and a standout density of low p-value associated with the true differential expressed proteins. The average of proteins in each interval of 0.01 p-value was 9.86, suggest that ~10 proteins with  $p < 0.01$  could be detected by chance.

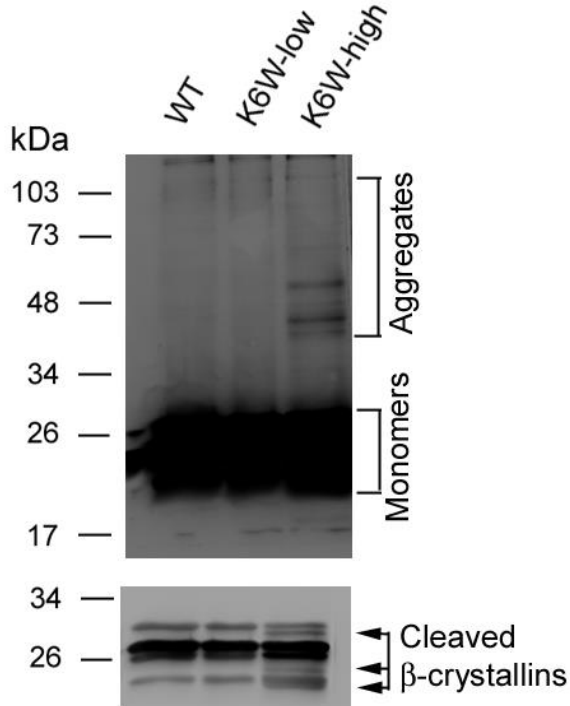

**Supplemental Fig. 2. Expression of high levels of K6W-ubiquitin results in aggregation and cleavage of  $\beta$ -crystallins.** Lenses from WT and K6W-Ub transgenic newborn (P1) mice were homogenized and proteins were separated by SDS-PAGE on 12% gel. After transfer to nitrocellulose membrane, the blot was probed with antibodies to total  $\beta$ -crystallins. Panel A was the longer exposure of the blot, which shows the aggregated form of  $\beta$ -crystallins in K6W-Ub high expressers. Panel B was the shorter exposure of the blot, which shows the monomer and cleaved forms of  $\beta$ -crystallins. The arrows indicate the fragmented forms.
